# Supplementary material for: Variable Susceptibility to Gallium Compounds of Major Cystic Fibrosis Pathogens
Source: PubMed Central journal article supplement (PMC8762661; doi:10.1021/acsinfecdis.1c00409), 2021-12-29
Supplement: id1c00409_si_001.pdf [file id1c00409_si_001.pdf]

## SUPPORTING INFORMATION

### Variable susceptibility to gallium compounds of major cystic fibrosis pathogens

Daniela Visaggio<sup>a,b\*</sup>, Emanuela Frangipani<sup>c</sup>, Sarah Hijazi<sup>a</sup>, Mattia Pirolo<sup>a</sup>, Livia Leoni<sup>a</sup>, Giordano Rampioni<sup>a,b</sup>, Francesco Imperi<sup>a,b</sup>, Lawrence Bernstein<sup>d</sup>, Raffaella Sorrentino<sup>e</sup>, Francesca Ungaro<sup>f</sup>, Paolo Visca<sup>a,b\*</sup>

<sup>a</sup>Department of Science, Roma Tre University, 00146 Rome, Italy

<sup>b</sup>Santa Lucia Foundation IRCCS, 00179 Rome, Italy

<sup>c</sup>Department of Biomolecular Sciences, University of Urbino Carlo Bo, 61029 Urbino, Italy

<sup>d</sup>Gallixa, Menlo Park, 94025 California, USA

<sup>e</sup>Department of Molecular Medicine and Medical Biotechnology, School of Medicine, University of Naples Federico II, 80138 Naples, Italy

<sup>f</sup>Department of Pharmacy, University of Naples Federico II, 80131 Naples, Italy

\*Corresponding Authors: Paolo Visca, [paolo.visca@uniroma3.it](mailto:paolo.visca@uniroma3.it); Department of Science, Roma Tre University, Viale Guglielmo Marconi 446, 00146 Rome, Italy; Phone: +39.06.57336347 - Daniela Visaggio, [daniela.visaggio@uniroma3.it](mailto:daniela.visaggio@uniroma3.it); Department of Science, Roma Tre University, Viale Guglielmo Marconi 446, 00146 Rome, Italy; Phone: +39.06.57336408.

#### Table of contents

|            |                                                                                         |     |
|------------|-----------------------------------------------------------------------------------------|-----|
| Table S1   | Characteristics of bacterial strains used in this study                                 | ii  |
| Table S2   | Iron concentration in culture media used for Ga(III) susceptibility testing             | iii |
| Figure S1  | Growth of reference non-fastidious CF pathogens in CAMHB, ID-CAMHB, ASM and RPMI-HS-CAA | iv  |
| References |                                                                                         | v   |

**Table S1. Characteristics of bacterial strains used in this study<sup>a</sup>**

| Bacterial species                   | Strain                  | Country        | Year      | Source                                 | Resistance | Reference               |
|-------------------------------------|-------------------------|----------------|-----------|----------------------------------------|------------|-------------------------|
| <i>Achromobacter xylosoxidans</i>   | ATCC 27061 <sup>T</sup> | Japan          | ns        | ear discharge                          | ns         | [1]                     |
| <i>A. xylosoxidans</i>              | CF-2                    | Italy          | 2008-2010 | respiratory secretion of CF patient    | MDR        | [2]                     |
| <i>A. xylosoxidans</i>              | CF-3                    | Italy          | 2008-2010 | respiratory secretion of CF patient    | MDR        | [2]                     |
| <i>A. xylosoxidans</i>              | CF-4                    | Italy          | 2008-2010 | respiratory secretion of CF patient    | MDR        | [2]                     |
| <i>Burkholderia cenocepacia</i>     | LMG 16656 <sup>T</sup>  | UK             | 1989      | sputum of CF patient                   | ns         | [3]                     |
| <i>B. cenocepacia</i>               | FFC 0076                | UK             | ns        | CF patient                             | ns         | This study <sup>b</sup> |
| <i>Burkholderia dolosa</i>          | LMG 18943 <sup>T</sup>  | USA            | ns        | sputum of CF patient                   | ns         | [4]                     |
| <i>B. dolosa</i>                    | FFC0305                 | USA            | ns        | CF patient                             | ns         | This study <sup>b</sup> |
| <i>Burkholderia multivorans</i>     | LMG 31010 <sup>T</sup>  | Belgium        | 1992      | CF patient                             | ns         | [5]b                    |
| <i>B. multivorans</i>               | 454                     | Czech Republic | 2002      | CF patient                             | ns         | This study <sup>b</sup> |
| <i>Haemophilus influenzae</i>       | ATCC 49247              | USA            | 1984      | sputum of a pneumonia patient          | ns         | ATCC                    |
| <i>H. influenzae</i>                | ATCC 9833               | USA            | ns        | CF of patient with meningitis          | ns         | ATCC                    |
| <i>H. influenzae</i>                | FC 89                   | Italy          | 2004-2009 | CF patient                             | AMP, IPM   | [6]                     |
| <i>H. influenzae</i>                | FC 104                  | Italy          | 2004-2009 | CF patient                             | ns         | [6]                     |
| <i>Mycobacterium abscessus</i>      | ATCC 19977 <sup>T</sup> | USA            | 1953      | Knee infection                         | MDR        | [7]                     |
| <i>M. abscessus</i>                 | ISS6                    | Italy          | ns        | unknown                                | MDR        | This study <sup>b</sup> |
| <i>M. abscessus</i>                 | ISS7                    | Italy          | ns        | unknown                                | MDR        | This study <sup>b</sup> |
| <i>M. abscessus</i>                 | ISS9                    | Italy          | ns        | unknown                                | MDR        | This study <sup>b</sup> |
| <i>Pseudomonas aeruginosa</i>       | ATCC 15692 (PAO1)       | ns             | ns        | infected wound                         | ns         | ATCC                    |
| <i>P. aeruginosa</i>                | TR1                     | Italy          | 2009      | respiratory secretion of CF patient    | ns         | [8]                     |
| <i>P. aeruginosa</i>                | FM12                    | Italy          | ns        | respiratory secretion of CF patient    | ns         | [9]                     |
| <i>P. aeruginosa</i>                | FM13                    | Italy          | ns        | respiratory secretion of CF patient    | ns         | [9]                     |
| <i>Staphylococcus aureus</i>        | ATCC 25923              | USA            | 1945      | human clinical                         | ns         | ATCC                    |
| <i>S. aureus</i>                    | BG-1                    | Italy          | 2016      | CF patient                             | ns         | This study <sup>b</sup> |
| <i>S. aureus</i>                    | BG-6                    | Italy          | 2016      | CF patient                             | MRSA       | This study <sup>b</sup> |
| <i>S. aureus</i>                    | BG-7                    | Italy          | 2016      | CF patient                             | MRSA       | This study <sup>b</sup> |
| <i>Stenotrophomonas maltophilia</i> | ATCC 13637 <sup>T</sup> | ns             | ns        | OP region of patient with mouth cancer | ns         | ATCC                    |
| <i>S. maltophilia</i>               | K279a                   | UK             | ns        | blood of non-CF patient                | MDR        | [10]                    |
| <i>S. maltophilia</i>               | OBGTC23                 | Italy          | 2003-2005 | sputum of CF patient                   | MDR        | [11]                    |
| <i>S. maltophilia</i>               | OBGTC26                 | Italy          | 2003-2005 | sputum of CF patient                   | MDR        | [11]                    |
| <i>Streptococcus pneumoniae</i>     | ATCC 33400 <sup>T</sup> | ns             | ns        | unknown                                | ns         | ATCC                    |
| <i>S. pneumoniae</i>                | PFC-01                  | Italy          | 2010      | CF patient                             | ns         | [12]                    |
| <i>S. pneumoniae</i>                | PFC-02                  | Italy          | 2010      | CF patient                             | ns         | [12]                    |
| <i>S. pneumoniae</i>                | PFC-04                  | Italy          | 2010      | CF patient                             | ns         | [12]                    |

<sup>a</sup> Abbreviations: ATCC, American type culture collection; AMP, ampicillin; CF, cystic fibrosis; CSF, cerebrospinal fluid; IPM, imipenem; MDR, multi-drug resistant; MRSA, methicillin-resistant *Staphylococcus aureus*; OP, Oropharyngeal; ns, not specified. <sup>T</sup> type strain.

<sup>b</sup> Identification of strains as member of *B. cepacia* complex was carried out by a triphasic analysis: (i) growth on the selective *Burkholderia cepacia* agar base (ThermoFisher); (ii) positive identification using the commercial system API 20NE (bioMérieux, Marcy l'Etoile, France); (iii) molecular identification by *recA*-PCR-Restriction Fragment Length Polymorphism as previously described<sup>13</sup>. *M. abscessus* was isolated on Lowenstein-Jensen solid medium and identified by matrix-assisted laser desorption ionization-time of flight mass spectrometry (MALDI-TOF MS, Bruker Daltonics); *S. aureus* strains were identified by both manual (API-STAPH System; bioMérieux, Marcy-L'Etoile, France) and automate (VITEK 2 System, bioMérieux) biochemical test-based system

**Table S2. Iron concentration in culture media used for Ga(III) susceptibility testing**

| <b>Medium</b> | <b>Iron (<math>\mu\text{M}</math>)</b> |
|---------------|----------------------------------------|
| CAMHB         | $3.305 \pm 0.001$                      |
| ID-CAMHB      | $0.143 \pm 0.006$                      |
| HTM           | $8.237 \pm 0.008$                      |
| DHTM          | $0.284 \pm 0.001$                      |
| THYB          | $17.136 \pm 0.011$                     |
| DTHYB         | $5.298 \pm 0.002$                      |
| ASM           | $3.880 \pm 0.002$                      |
| RPMI-CAA      | $0.210 \pm 0.001$                      |
| RPMI-HS-CAA   | $1.820 \pm 0.002$                      |

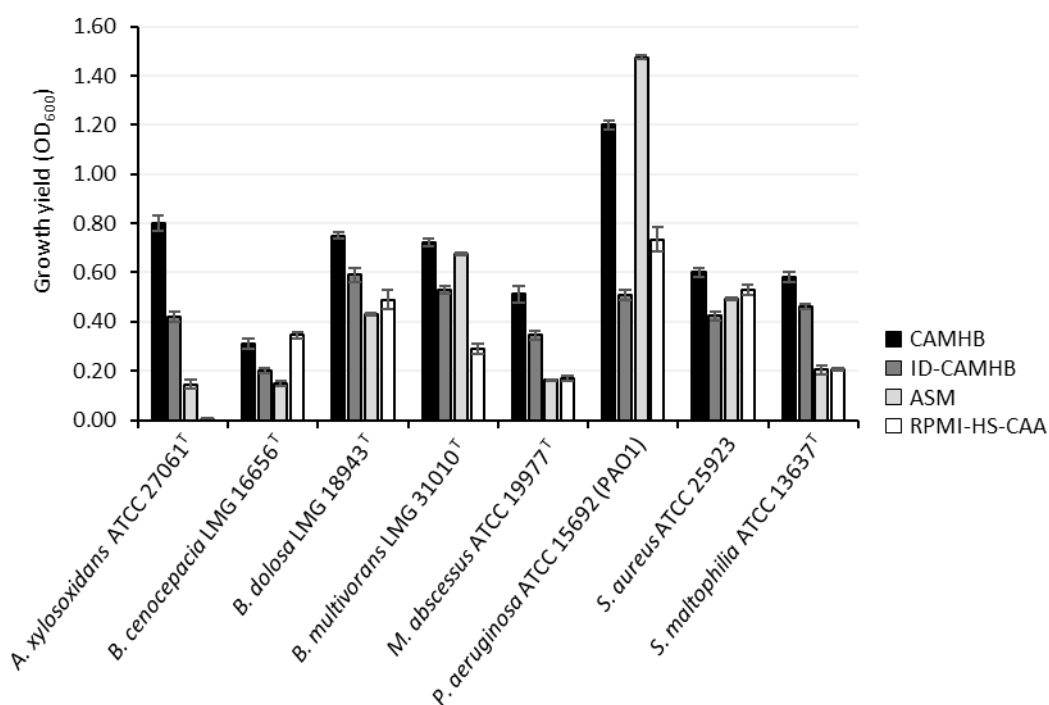

**Figure S1.** Growth of reference non-fastidious CF pathogens in CAMHB, ID-CAMHB, ASM and RPMI-HS-CAA. Individual bacterial strains were inoculated (*ca.*  $5 \times 10^5$  CFU/ml) into 96-well microtiter plates containing CAMHB (black), ID-CAMHB (dark grey), ASM (light grey) and RPMI-HS-CAA (white). The OD<sub>600</sub> was determined after 24-h incubation at 37 °C for all strains except *M. abscessus* ATCC 19977<sup>T</sup> which required 72-h incubation. Data are the means of triplicate experiments  $\pm$  standard deviation.

## References

- [1] Yabuuchi, E., Oyama, A. (1971) *Achromobacter xylosoxidans* n. sp. from human ear discharge. *Jpn. J. Microbiol.* 15, 477-481. DOI: 10.1111/j.1348-0421.1971.tb00607.x.
- [2] Trancassini, M., Iebba, V., Citerà, N., Tuccio, V., Magni, A., Varesi, P., De Biase, R.V., Totino, V., Santangelo, F., Gagliardi, A., Schippa, S. (2014) Outbreak of *Achromobacter xylosoxidans* in an Italian Cystic fibrosis center: genome variability, biofilm production, antibiotic resistance, and motility in isolated strains. *Front. Microbiol.* 5, 138. DOI: 10.3389/fmicb.2014.00138.
- [3] Govan, J.R., Brown, P.H., Maddison, J., Doherty, C.J., Nelson, J.W., Dodd, M., Greening, A.P., Webb, A.K. (1993) Evidence for transmission of *Pseudomonas cepacia* by social contact in cystic fibrosis. *Lancet* 342, 15-19. DOI: 10.1016/0140-6736(93)91881-l.
- [4] Coenye, T., LiPuma, J.J., Henry, D., Hoste, B., Vandemeulebroecke, K., Gillis, M., Speert, D.P., Vandamme, P. (2001) *Burkholderia cepacia* genomovar VI, a new member of the *Burkholderia cepacia* complex isolated from cystic fibrosis patients. *Int. J. Syst. Evol. Microbiol.* 51, 271-279. DOI: 10.1099/00207713-51-2-271.
- [5] Vandamme, P., Holmes, B., Vancanneyt, M., Coenye, T., Hoste, B., Coopman, R., Revets, H., Lauwers, S., Gillis, M., Kersters, K., Govan, J.R. (1997) Occurrence of multiple genomovars of *Burkholderia cepacia* in cystic fibrosis patients and proposal of *Burkholderia multivorans* sp. nov. *Int. J. Syst. Bacteriol.* 47, 1188-1200. DOI: 10.1099/00207713-47-4-1188.
- [6] Cardines, R., Giufrè, M., Pompilio, A., Fiscarelli, E., Ricciotti, G., Di Bonaventura, G., Cerquetti, M. (2012) *Haemophilus influenzae* in children with cystic fibrosis: antimicrobial susceptibility, molecular epidemiology, distribution of adhesins and biofilm formation. *Int. J. Med. Microbiol.* 302, 45-52. DOI: 10.1016/j.ijmm.2011.08.003.
- [7] Moore, M., Frerichs, J.B. (1953) An unusual acid-fast infection of the knee with subcutaneous, abscess-like lesions of the gluteal region; report of a case with a study of the organism, *Mycobacterium abscessus*, n. sp. *J. Invest. Dermatol.* 20, 133-69. DOI: 10.1038/jid.1953.18.
- [8] Bragonzi, A., Paroni, M., Nonis, A., Cramer, N., Montanari, S., Rejman, J., Di Serio, C., Döring, G., Tümmler, B. (2009) *Pseudomonas aeruginosa* microevolution during cystic fibrosis lung infection establishes clones with adapted virulence. *Am. J. Respir. Crit. Care Med.* 180, 138-145. DOI: 10.1164/rccm.200812-1943OC.
- [9] Massai, F., Imperi, F., Quattrucci, S., Zennaro, E., Visca, P., Leoni, L. (2011) A multitask biosensor for micro-volumetric detection of N-3-oxo-dodecanoyl-homoserine lactone quorum sensing signal. *Biosens. Bioelectron.* 26, 3444-3449. DOI: 10.1016/j.bios.2011.01.022.
- [10] Avison, M.B., Higgings, C.S., von Heldreich, C.J., Bennett, P.M., Walsh, T.R. (2001) Plasmid location and molecular heterogeneity of the L1 and L2  $\beta$ -lactamase genes of *Stenotrophomonas maltophilia*. *Antimicrob. Agents Chemother.* 45, 413-419. DOI: 10.1128/AAC.45.2.413-419.2001.
- [11] Di Bonaventura, G., Prosseda, G., Del Chierico, F., Cannavacciuolo, S., Cipriani, P., Petrucca, A., Superti, F., Ammendolia, M.G., Concato, C., Fiscarelli, E., Casalino, M., Piccolomini, R., Nicoletti, M., Colonna, B. (2007) Molecular characterization of virulence determinants of *Stenotrophomonas maltophilia* strains isolated from patients affected by cystic fibrosis. *Int. J. Immunopathol. Pharmacol.* 20, 529-537. DOI: 10.1177/039463200702000311.
- [12] Pimentel de Araujo, F., D'Ambrosio, F., Camilli, R., Fiscarelli, E., Di Bonaventura, G., Baldassarri, L., Visca, P., Pantosti, A., Gherardi, G. (2014) Characterization of *Streptococcus pneumoniae* clones from paediatric patients with cystic fibrosis. *J. Med. Microbiol.* 63, 1704-1715. DOI: 10.1099/jmm.0.072199-0.
- [13] Mahenthalingam, E., Bischof, J., Byrne, S.K., Radomski, C., Davies, J.E., Av-Gay, Y., Vandamme, P. (2000) DNA-Based diagnostic approaches for identification of *Burkholderia cepacia* complex, *Burkholderia vietnamiensis*, *Burkholderia multivorans*, *Burkholderia stabilis*, and *Burkholderia cepacia* genomovars I and III. *J. Clin. Microbiol.* 38, 3165-3173. DOI: 10.1128/JCM.38.9.3165-3173.2000.
